# Supplementary material for: A Comprehensive Bioinformatics Analysis of UBE2C in Cancers
Source: MDPI journal article supplement (doi:10.3390/ijms20092228), 2019-05-07

## Panel 1. *UBE2C* expression in urologic tumours.

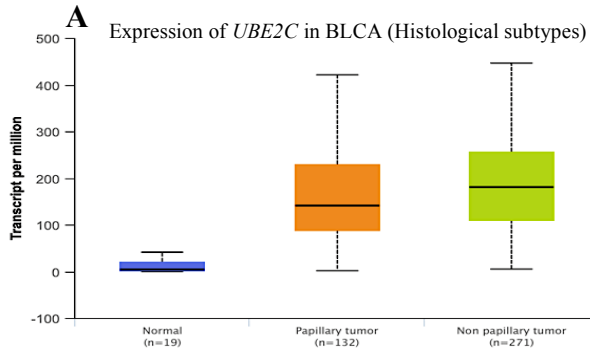

| Comparison                              | p-value     |
|-----------------------------------------|-------------|
| Normal-vs-Papillary tumors              | $<10^{-12}$ |
| Normal-vs-NonPapillary tumors           | $<10^{-12}$ |
| Papillary tumors-vs-NonPapillary tumors | 0.014       |

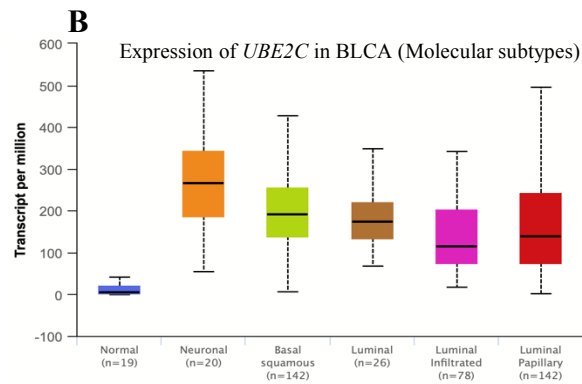

| Comparison                               | p-value     |
|------------------------------------------|-------------|
| Normal-vs-Neuronal                       | $<10^{-8}$  |
| Normal-vs-Basal squamous                 | $<10^{-12}$ |
| Normal-vs-Luminal                        | $<10^{-10}$ |
| Normal-vs-Luminal_Infiltrated            | $<10^{-9}$  |
| Normal-vs-Luminal_Papillary              | $<10^{-12}$ |
| Neuronal-vs-Basal squamous               | 0.02        |
| Neuronal-vs-Luminal                      | 0.03        |
| Neuronal-vs-Luminal_Infiltrated          | 0.014       |
| Neuronal-vs-Luminal_Papillary            | $<10^{-3}$  |
| Basal squamous-vs-Luminal                | 0.49        |
| Basal squamous-vs-Luminal_Infiltrated    | 0.032       |
| Basal squamous-vs-Luminal_Papillary      | $<10^{-3}$  |
| Luminal-vs-Luminal_Infiltrated           | 0.22        |
| Luminal-vs-Luminal_Papillary             | 0.42        |
| Luminal_Infiltrated-vs-Luminal_Papillary | 0.61        |

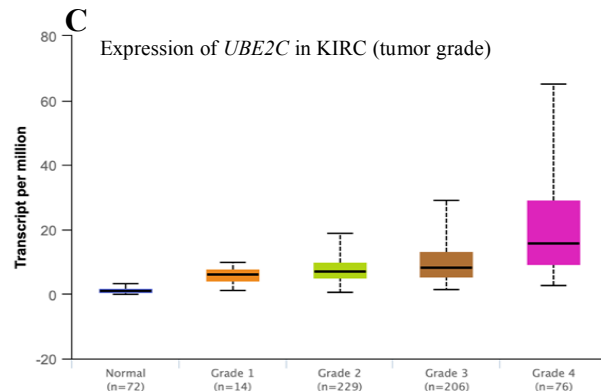

| Comparison         | p-value     |
|--------------------|-------------|
| Normal-vs-Grade 1  | $<10^{-3}$  |
| Normal-vs-Grade 2  | $<10^{-11}$ |
| Normal-vs-Grade 3  | $<10^{-9}$  |
| Normal-vs-Grade 4  | $<10^{-6}$  |
| Grade 1-vs-Grade 2 | $<10^{-4}$  |
| Grade 1-vs-Grade 3 | $<10^{-6}$  |
| Grade 1-vs-Grade 4 | $<10^{-5}$  |
| Grade 2-vs-Grade 3 | $<10^{-3}$  |
| Grade 2-vs-Grade 4 | $<10^{-5}$  |
| Grade 3-vs-Grade 4 | $<10^{-3}$  |

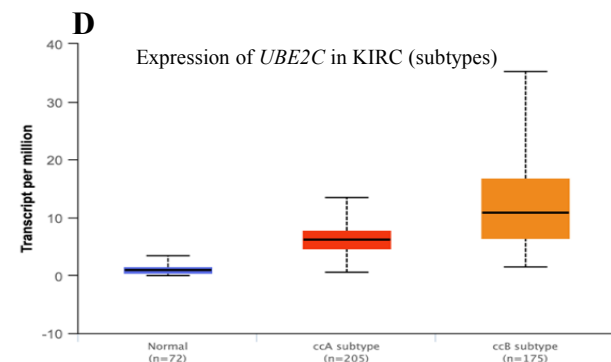

| Comparison                 | p-value    |
|----------------------------|------------|
| Normal-vs-ccA subtype      | $10^{-8}$  |
| Normal-vs-ccB subtype      | $<10^{-8}$ |
| ccA subtype-vs-ccB subtype | $<10^{-5}$ |

**E** Expression of *UBE2C* in KIRP (histologic subtypes)

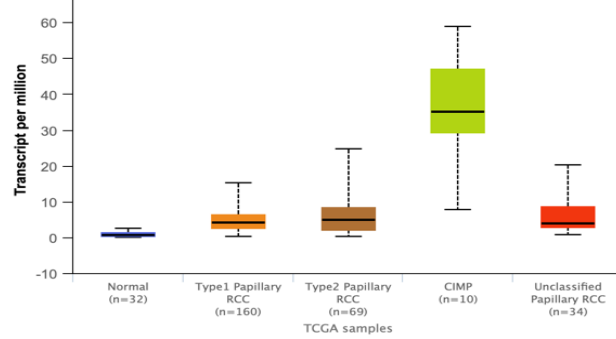

| Comparison                      | p-value      |
|---------------------------------|--------------|
| Normal-VS-Type1 PRCC            | $<10^{-12}$  |
| Normal-VS-Type2 PRCC            | $<10^{-7}$   |
| Normal-VS-KIRP CIMP             | $<10^{-3}$   |
| Normal-VS-Unclassified PRCC     | $<10^{-3}$   |
| Type1 PRCC-VS-Type2 PRCC        | $<10^{-3}$   |
| Type1 PRCC-VS-KIRP CIMP         | $<10^{-3}$   |
| Type1 PRCC-VS-Unclassified PRCC | 0.095        |
| Type2 PRCC-VS-KIRP CIMP         | <b>0.015</b> |
| Type2 PRCC-VS-Unclassified PRCC | 0.89         |
| KIRP CIMP-VS-Unclassified PRCC  | <b>0.015</b> |

**F** Expression of *UBE2C* in PRAD (patient's gleason score)

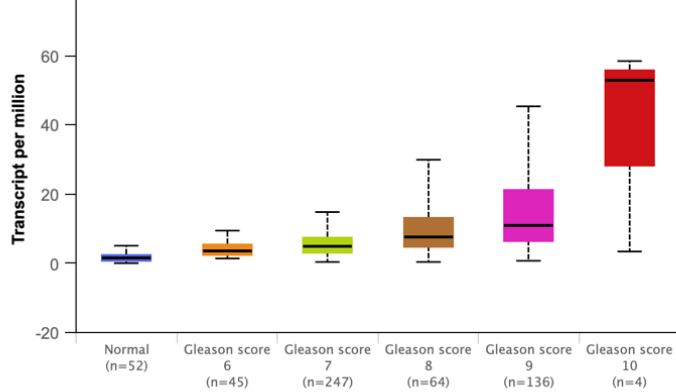

| Comparison                          | p-value    |
|-------------------------------------|------------|
| Normal-vs-Gleason score 6           | 0.53       |
| Normal-vs-Gleason score 7           | $<10^{-3}$ |
| Normal-vs-Gleason score 8           | $<10^{-5}$ |
| Normal-vs-Gleason score 9           | $<10^{-4}$ |
| Normal-vs-Gleason score 10          | 0.16       |
| Gleason score 6-vs-Gleason score 7  | $<10^{-5}$ |
| Gleason score 6-vs-Gleason score 8  | $<10^{-5}$ |
| Gleason score 6-vs-Gleason score 9  | $<10^{-4}$ |
| Gleason score 6-vs-Gleason score 10 | 0.16       |
| Gleason score 7-vs-Gleason score 8  | $<10^{-3}$ |
| Gleason score 7-vs-Gleason score 9  | $<10^{-3}$ |
| Gleason score 7-vs-Gleason score 10 | 0.17       |
| Gleason score 8-vs-Gleason score 9  | 0.058      |
| Gleason score 8-vs-Gleason score 10 | 0.2        |
| Gleason score 9-vs-Gleason score 10 | 0.1        |

**G** Expression of *UBE2C* in PRAD (molecular signature)

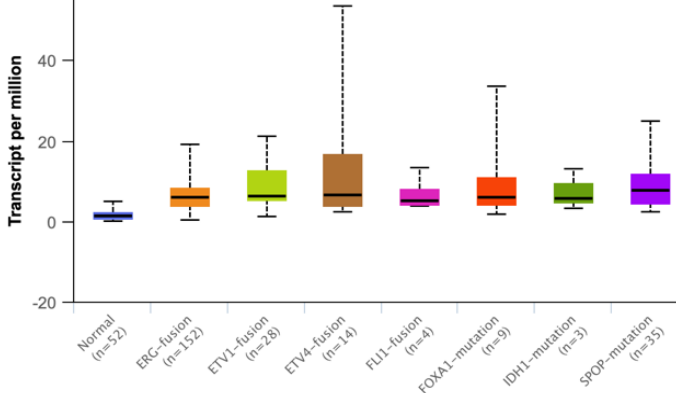

| Comparison                      | p-value    |
|---------------------------------|------------|
| Normal-vs-ERG fusion            | $<10^{-5}$ |
| Normal-vs-ETV1 fusion           | $<10^{-3}$ |
| Normal-vs-ETV4 fusion           | 0.11       |
| Normal-vs-FLI1 fusion           | 0.4        |
| Normal-vs-FOXA1 mutation        | 0.08       |
| Normal-vs-IDH1 mutation         | 0.4        |
| Normal-vs-SPOP mutation         | $<10^{-5}$ |
| ERG fusion-vs-ETV1 fusion       | 0.62       |
| ERG fusion-vs-ETV4 fusion       | 0.21       |
| ERG fusion-vs-FLI1 fusion       | 0.62       |
| ERG fusion-vs-FOXA1 mutation    | 0.34       |
| ERG fusion-vs-IDH1 mutation     | 0.75       |
| ERG fusion-vs-SPOP mutation     | 0.1        |
| ETV1 fusion-vs-ETV4 fusion      | 0.23       |
| ETV1 fusion-vs-FLI1 fusion      | 0.48       |
| ETV1 fusion-vs-FOXA1 mutation   | 0.44       |
| ETV1 fusion-vs-IDH1 mutation    | 0.61       |
| ETV1 fusion-vs-SPOP mutation    | 0.44       |
| ETV4 fusion-vs-FLI1 fusion      | 0.17       |
| ETV4 fusion-vs-FOXA1 mutation   | 0.39       |
| ETV4 fusion-vs-IDH1 mutation    | 0.18       |
| ETV4 fusion-vs-SPOP mutation    | 0.28       |
| FLI1 fusion-vs-FOXA1 mutation   | 0.39       |
| FLI1 fusion-vs-IDH1 mutation    | 0.89       |
| FLI1 fusion-vs-SPOP mutation    | 0.37       |
| FOXA1 mutation-vs-IDH1 mutation | 0.49       |
| FOXA1 mutation-vs-SPOP mutation | 0.54       |
| IDH1 mutation-vs-SPOP mutation  | 0.49       |

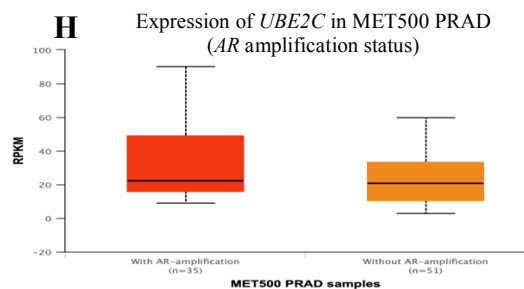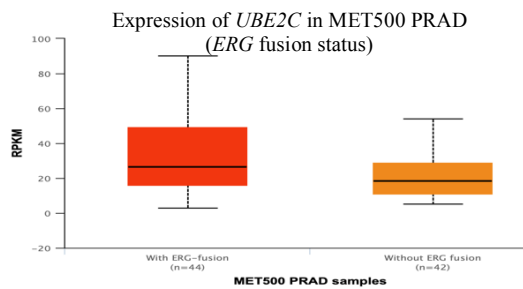

## Panel 2. *UBE2C* expression in BRCA and metastatic BRCA

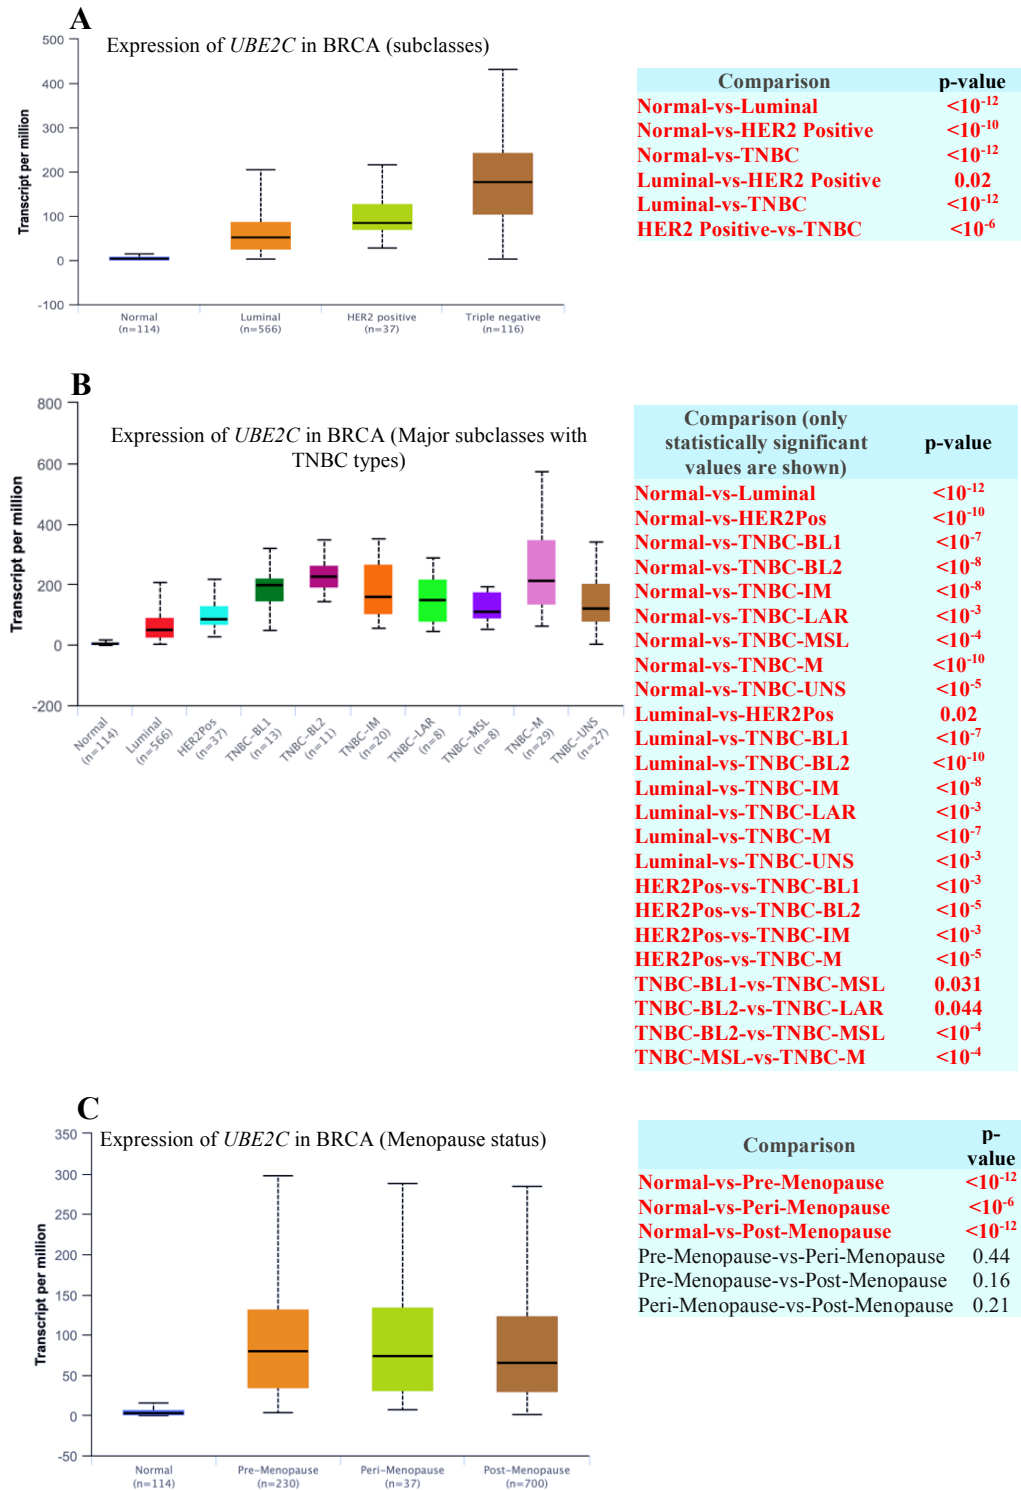

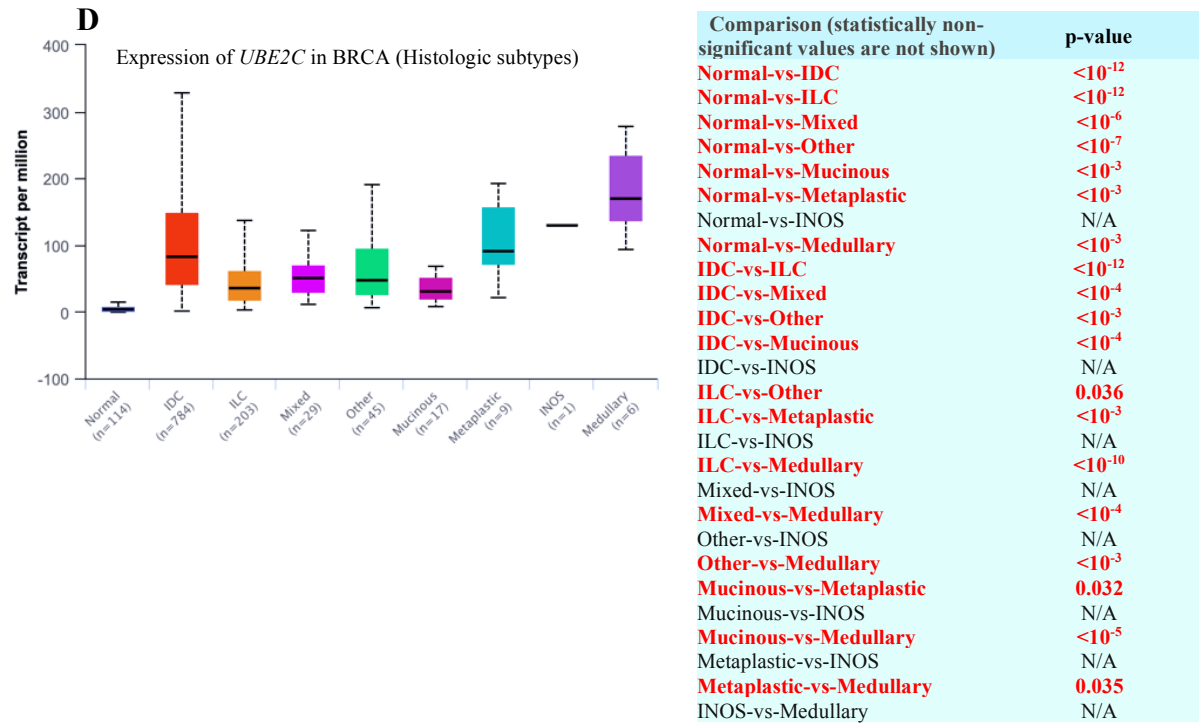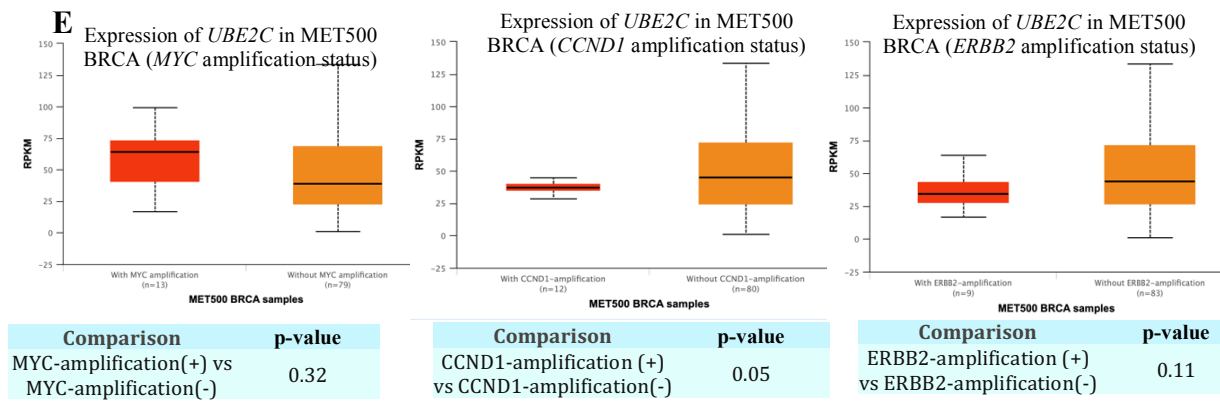

### Panel 3. *UBE2C* expression in digestive system tumours

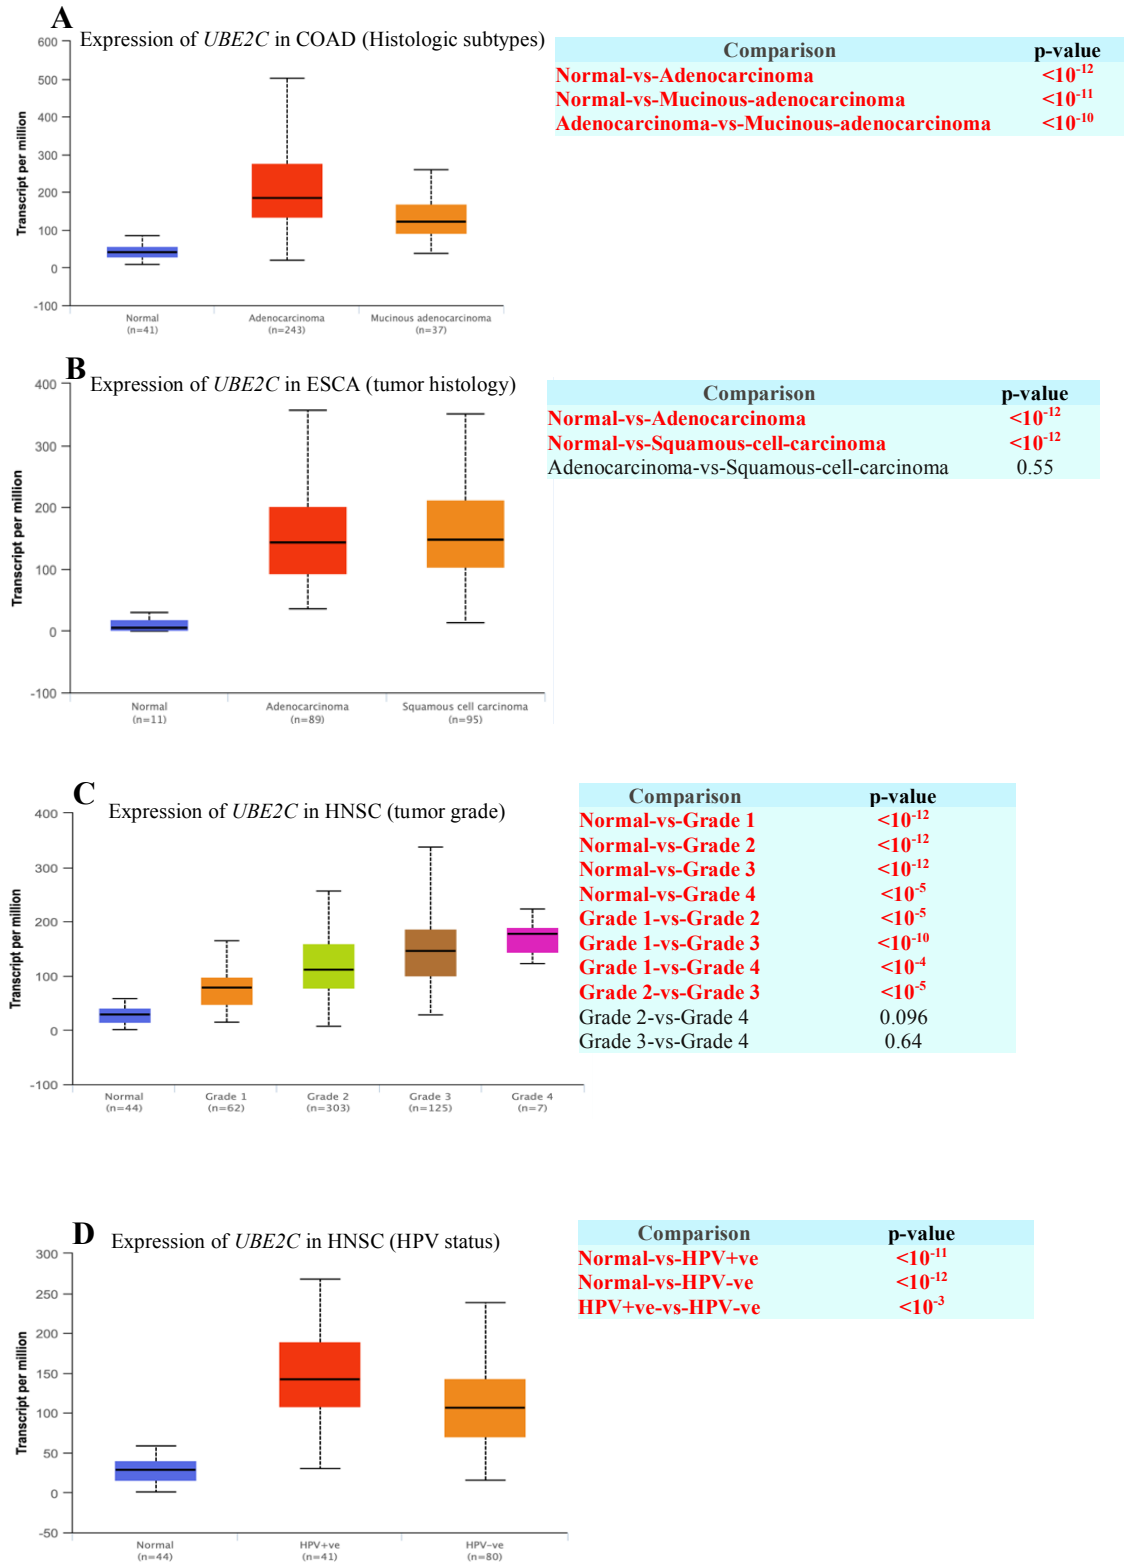

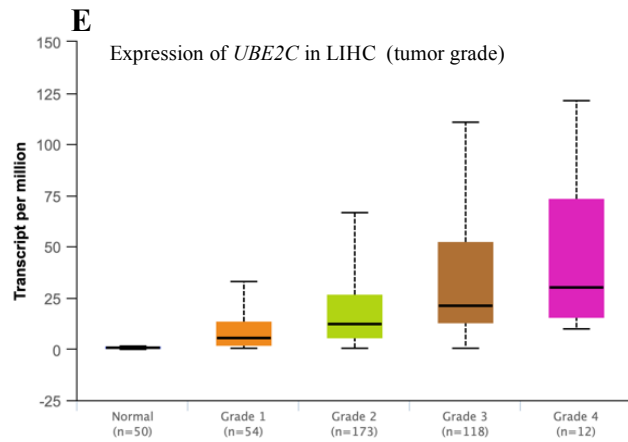

| Comparison         | p-value     |
|--------------------|-------------|
| Normal-vs-Grade 1  | $<10^{-5}$  |
| Normal-vs-Grade 2  | $<10^{-12}$ |
| Normal-vs-Grade 3  | $<10^{-12}$ |
| Normal-vs-Grade 4  | $<10^{-3}$  |
| Grade 1-vs-Grade 2 | 0.13        |
| Grade 1-vs-Grade 3 | $<10^{-4}$  |
| Grade 1-vs-Grade 4 | 0.02        |
| Grade 2-vs-Grade 3 | $<10^{-3}$  |
| Grade 2-vs-Grade 4 | 0.16        |
| Grade 3-vs-Grade 4 | 0.96        |

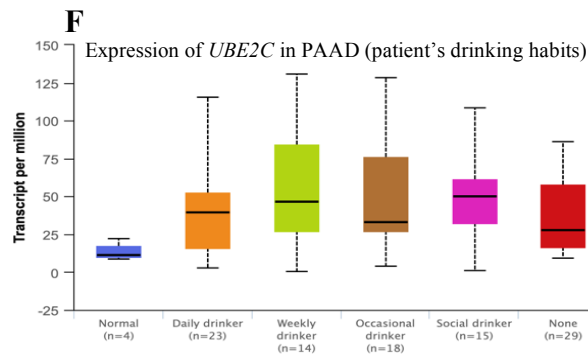

| Comparison (only statistically significant values are shown) | p-value    |
|--------------------------------------------------------------|------------|
| Normal-vs-Weekly Drinker                                     | 0.025      |
| Normal-vs-Occasional Drinker                                 | $<10^{-3}$ |

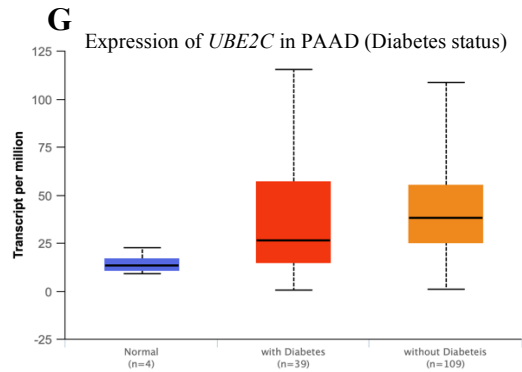

| Comparison              | p-value    |
|-------------------------|------------|
| Normal-vs-Diabetic      | $<10^{-4}$ |
| Normal-vs-NonDiabetic   | $<10^{-7}$ |
| Diabetic-vs-NonDiabetic | 0.37       |

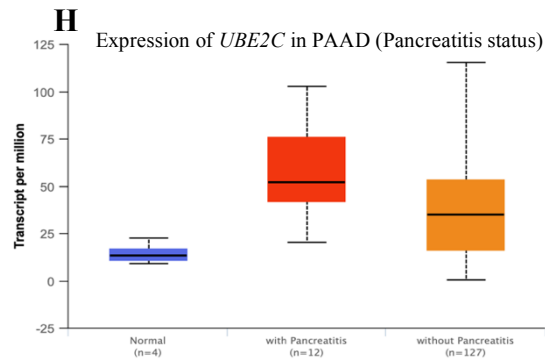

| Comparison                     | p-value    |
|--------------------------------|------------|
| Normal-vs-Pancreatitis         | $<10^{-4}$ |
| Normal-vs-NoPancreatitis       | $<10^{-7}$ |
| Pancreatitis-vs-NoPancreatitis | 0.24       |

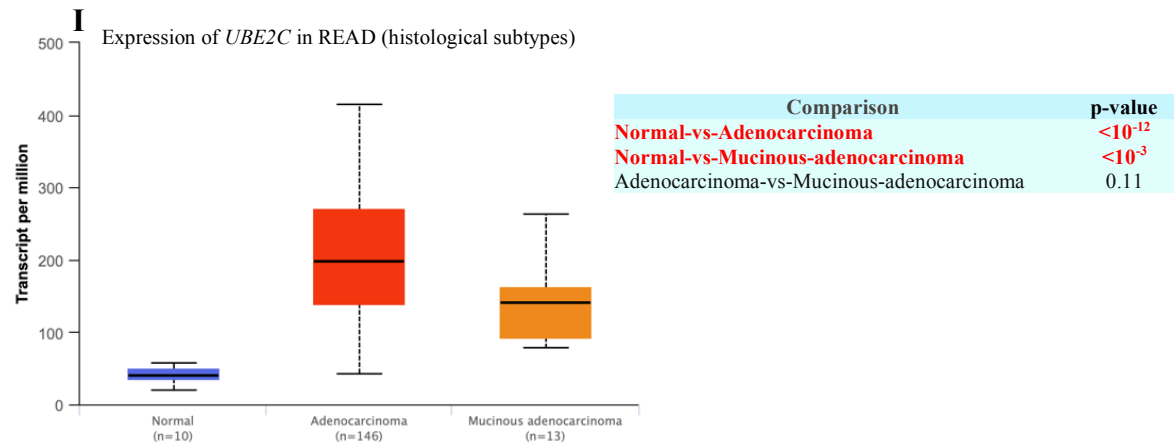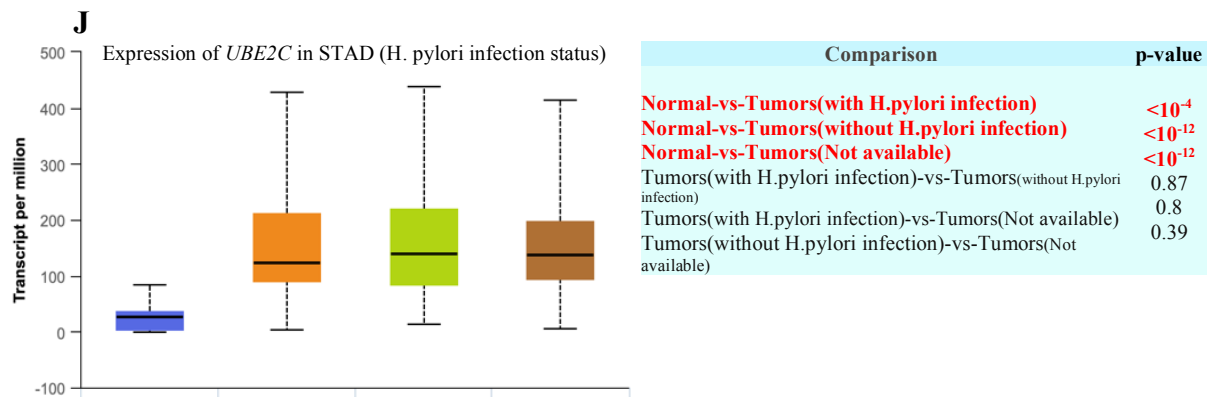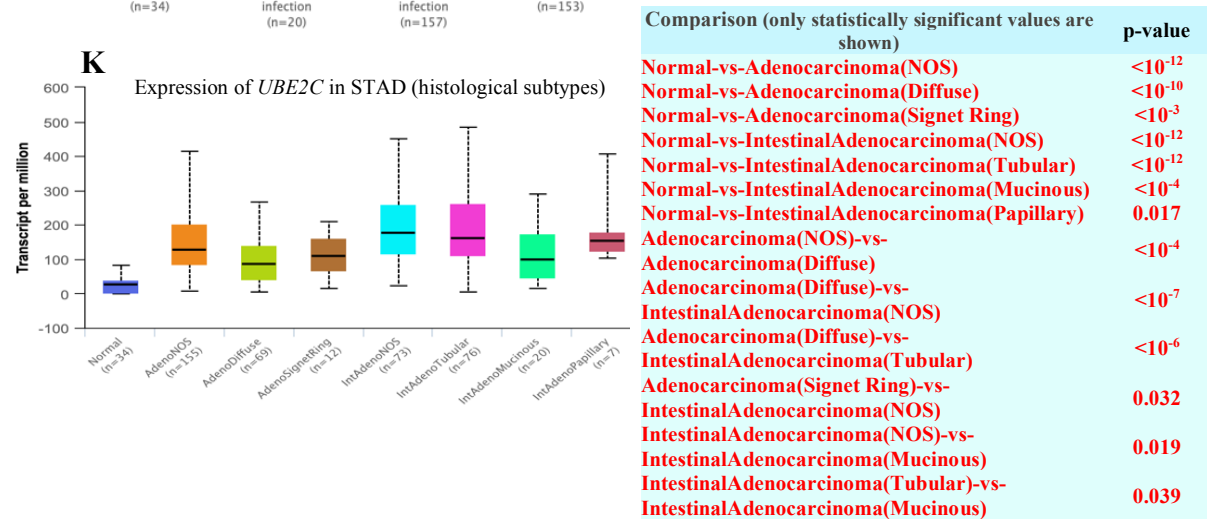



**Panel 4.** *UBE2C* expression in lung tumours

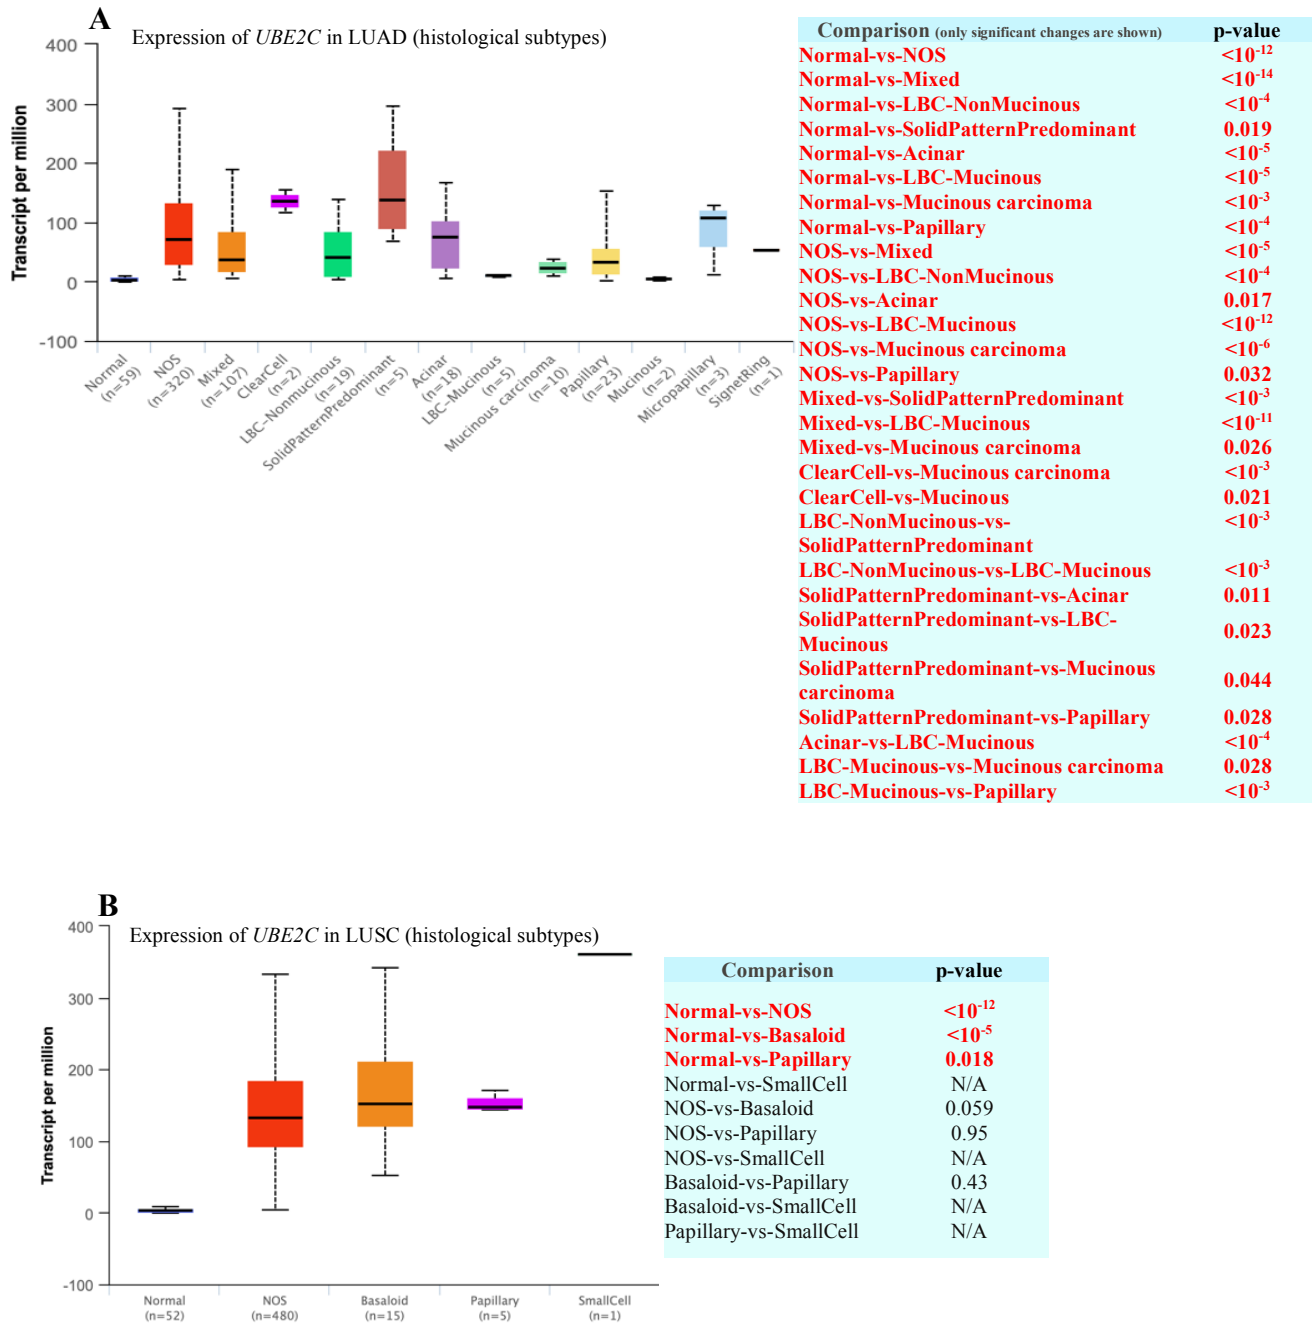

**Panel 5. *UBE2C* expression in UCEC**

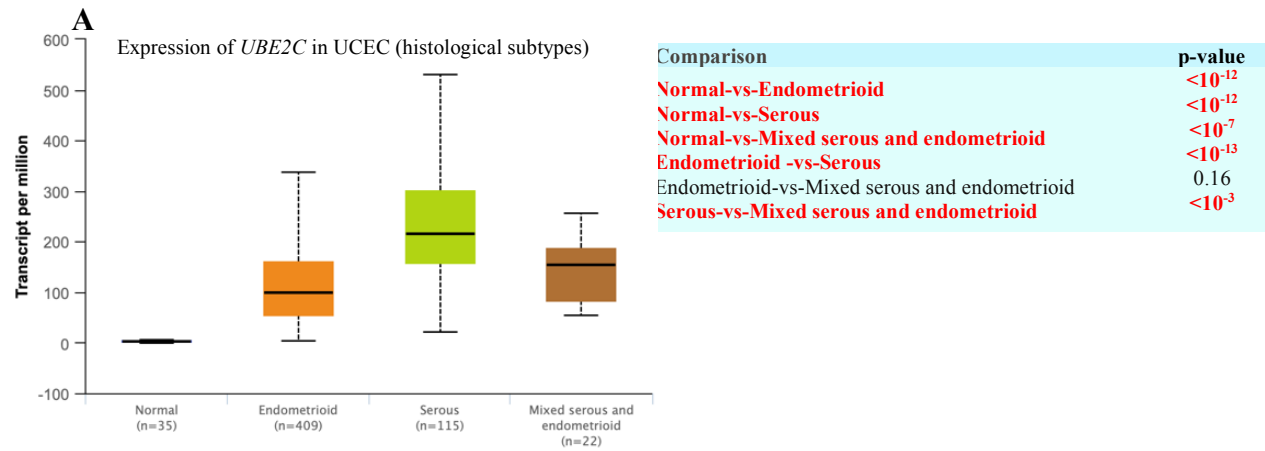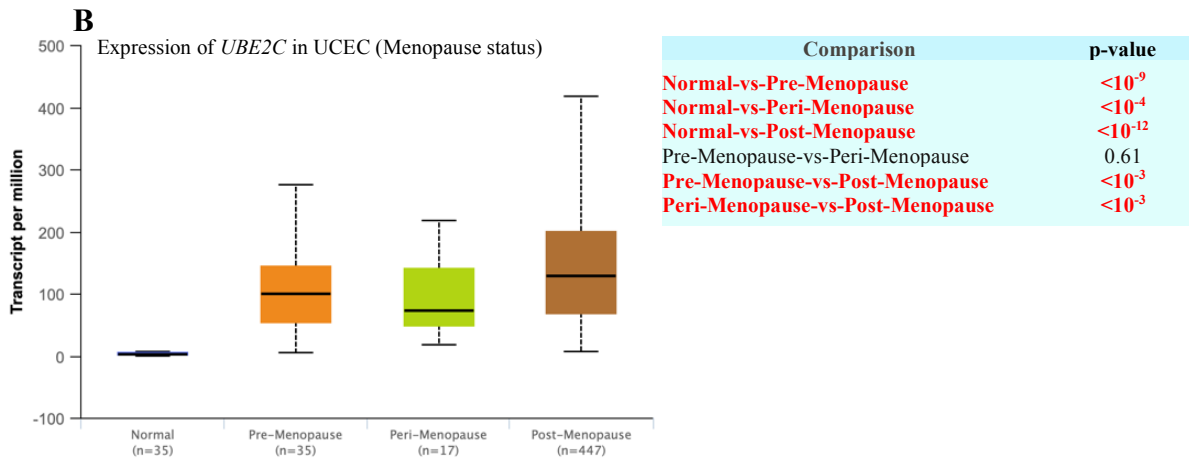

**Panel 6. *UBE2C* expression based on smoking habits in BLCA, ESCA, LUAD, LUSC**

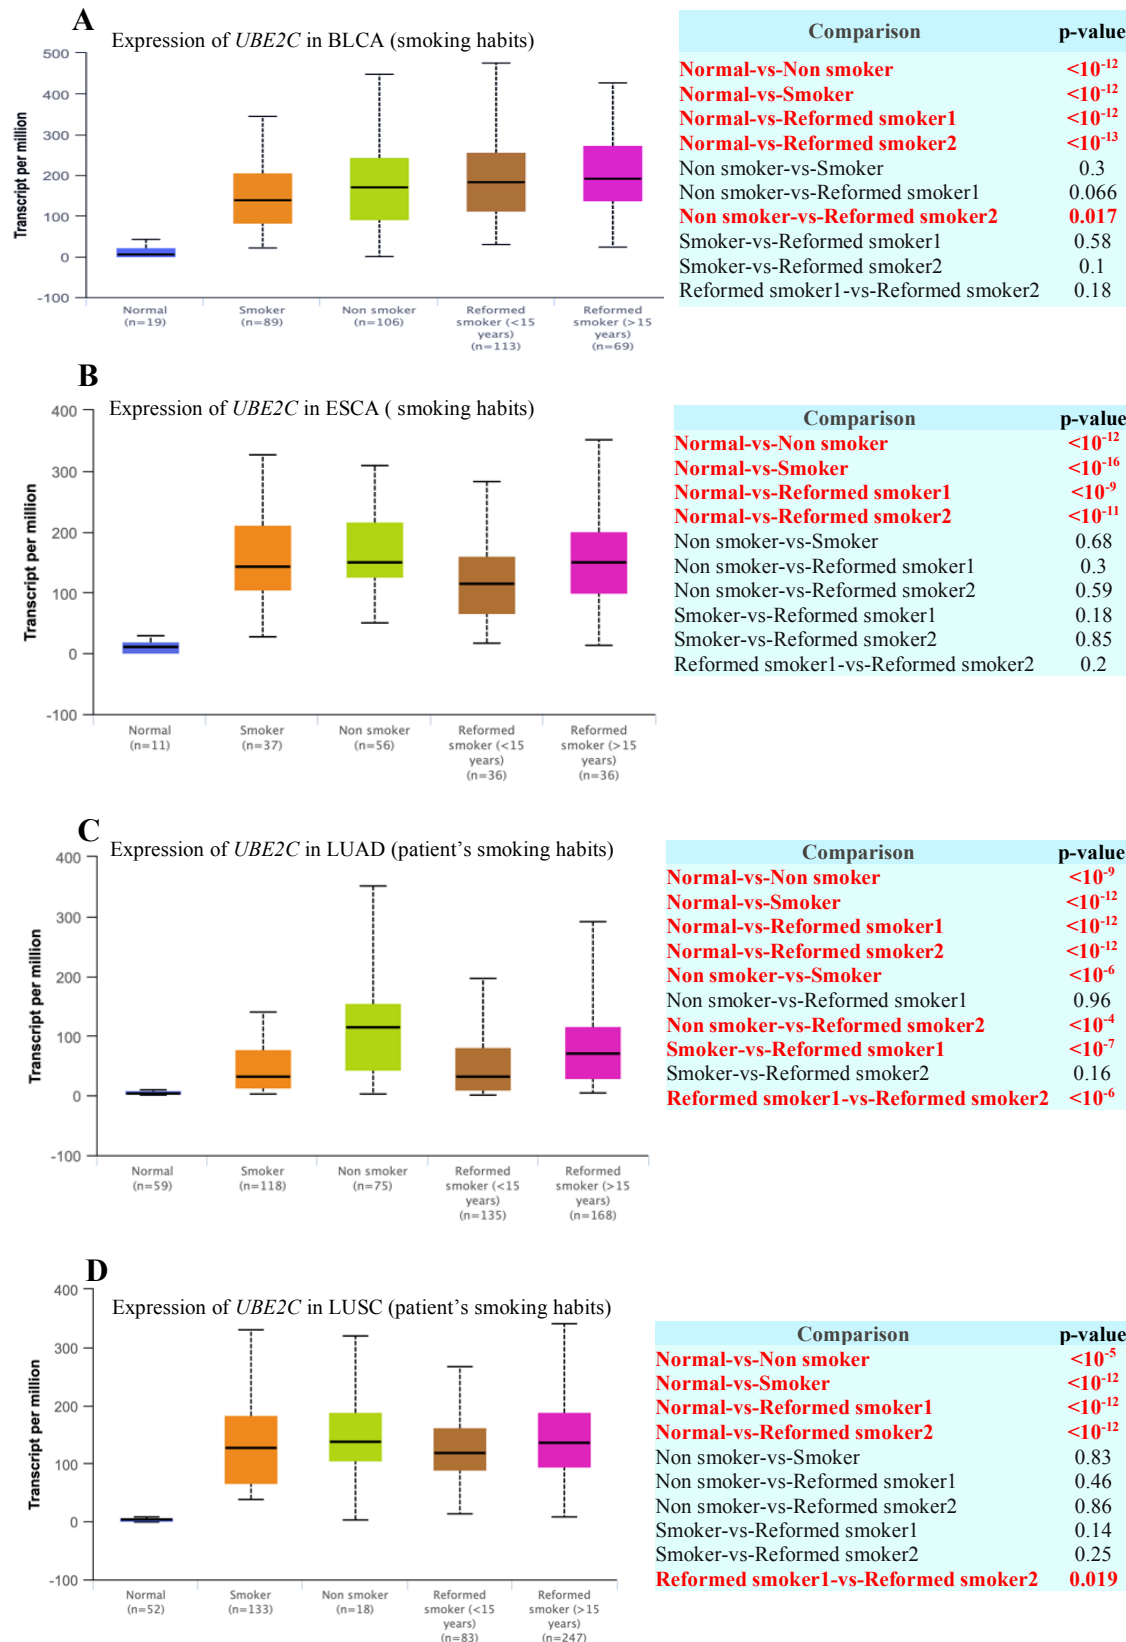

Supplement: s1 [file s1]
