# Supplementary material for: A Comprehensive Bioinformatics Analysis of UBE2C in Cancers
Source: MDPI journal article supplement (doi:10.3390/ijms20092228), 2019-05-07
Supplement: s1 [file s1]

Total free energy of binding: -18.82 kcal/mol  
Energy from duplex formation: -43.58 kcal/mol  
Opening energy for the longer sequence: 8.82 kcal/mol  
Opening energy for the shorter sequence: 15.94 kcal/mol  
(((((((((((.((((((((((I&)))))))).).)))))))))

### Graphical output

The plot below shows the interaction free energy (RED)  $\Delta G_i$  and the energy needed to open existing structures in the longer sequence (BLACK) for the target region (top) and the whole range (bottom).

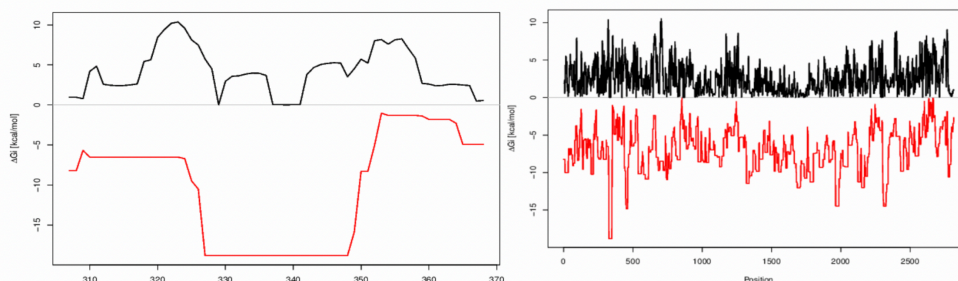

**Panel A.** RNA-RNA interaction related to TSPYL2 (black) and UBE2C (red).

**Protein:** MASQNRDPAATSVAAARKGAEPSSGAARGPVGKRLQQELMTLMMMSGDKGISAFPESDNLFWVGTHIGAAGTVYEDLRYKLKSLFEPSSGYPNAPT VKFLTPCYHPNVDQTQGNICLDLKEKWSALYDVRTILLSIQSLLGEPNIDSPLNTHAAELWKNPTAFKKYLOETYSKQVTSQEP

[illegible]

### Interaction probabilities

|                                |     |
|--------------------------------|-----|
| Prediction using RF classifier | 0.9 |
|--------------------------------|-----|

|                                 |      |
|---------------------------------|------|
| Prediction using SVM classifier | 0.76 |
|---------------------------------|------|

RPISeq gives interaction probabilities in the range between 0 and 1. In performance evaluation experiments, predictions with probabilities  $> 0.5$  is considered “positive,” i.e., representing that RNA and protein are likely to interact.

**Panel B.** Protein-RNA interaction related to UBE2C protein (top) and TSPYL2 RNA (down).

| Predicted Sites |                           |       |        |       |
|-----------------|---------------------------|-------|--------|-------|
| Position        | Peptide                   | Score | Cutoff | Type  |
| 45 - 48         | PLPPPQ <b>RPRL</b> QEETEA | 5.351 | 5.164  | D-box |

  

Enter sequence(s) in FASTA format

```

>TSPYL2
MDRDPDEGPPAKTRRLSSSESPQRDP PPPPPPLRLPLPPQQRPLQEETEAQVLADMRGVGLGALPPPPPVILEECIRAYFTLCAECPQWDSTIESCYGEAPPTESLEALPTPEASGCSLEIDFQ
VVQSSFGGEGALETCSAVGWAPRLVDPKSEEAIIIVEDEDEDERESMRSSRRRRRRRRKQKVKRESRENAERMESILQALEDIQLDLEAVNIKAGKAFRLRKFIQMRPFLERRDLIIQHIFGF
WVKAFLNHPRISILNRRDEDIFRYLTNLQVQDLRHISMGYKMKLYFQTNPYFTNMVYKEFQRNRSCLVSHSTPRWHRCQEPQARRHCNQDASHSF5WFSNHSLEADRIAEIKNDLWVNPRL
YYLRGCSRIKQKQEMKKRTRGACEVIMEDAPDYAYVEDIFSEISDIDETHDKISDFMETDYFETDNETDININICDSENPDHNEVPNNETDANNESADHETDANNESADNNENPEDN
NKNTDDNEENPNNNENTYGCNFFKCGFWCSHGCMNQDSSDSDEADSEASDDEDDNDCNECDNECSDDDCNECDNECSDDDDRDIEYKEVIEDFDKQADYEDVIEIISDIFVEECIEEGIQQD
EDIYEEGNVEECSEDWEECEDSDSDLEDVLQVNGWANPCKRCKTG

```

  

Threshold

☒ D-box    Medium    ☒ KEN-box    Low

Console

**Panel C.** The presence of D-box in TSPYL2 protein.
