# Supplementary figures and images for: A Comprehensive Bioinformatics Analysis of UBE2C in Cancers
Source: MDPI journal article supplement (doi:10.3390/ijms20092228), 2019-05-07

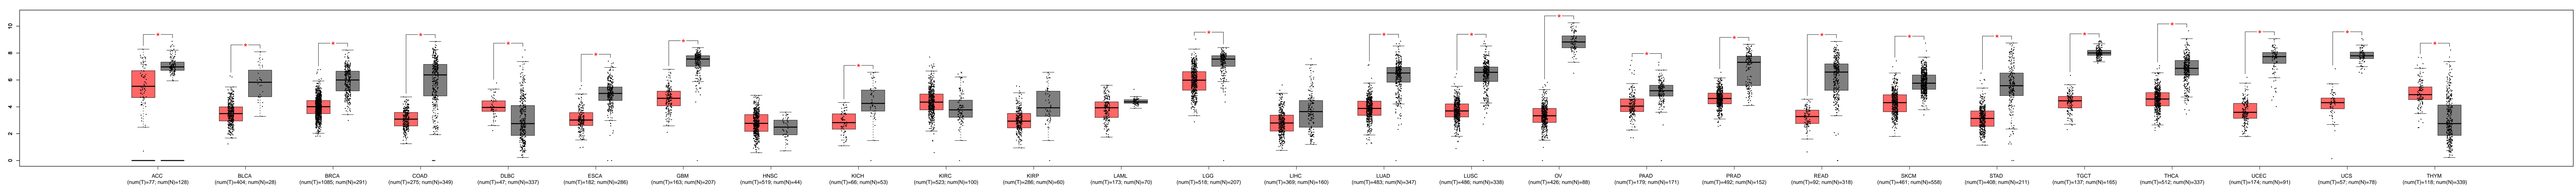

Supplement: s1 [file s1]

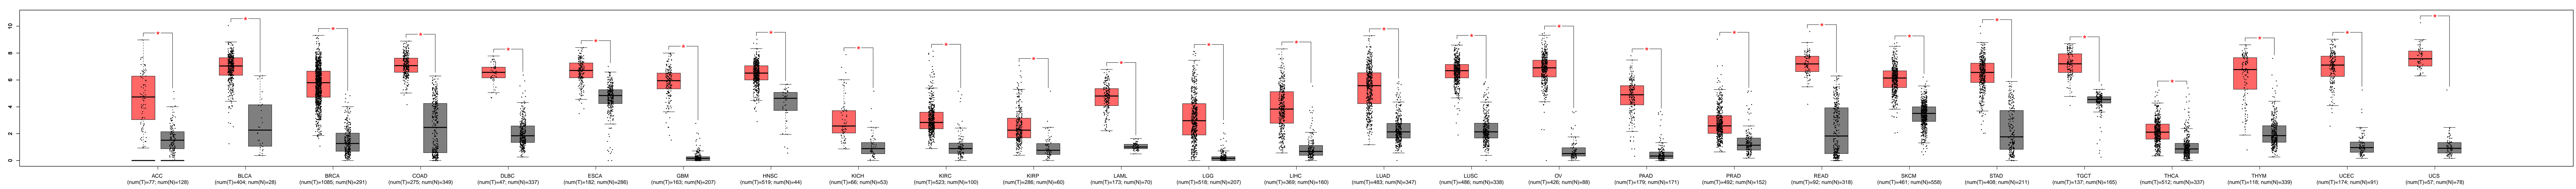

Supplement: s1 [file s1]

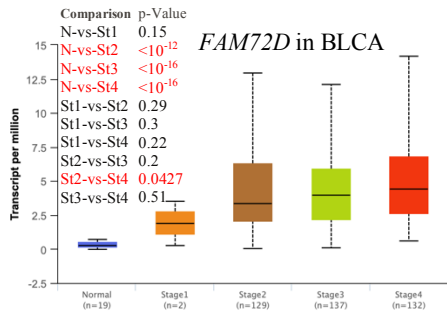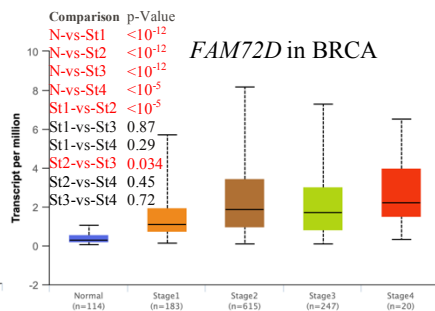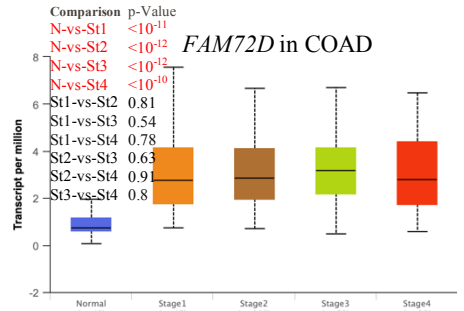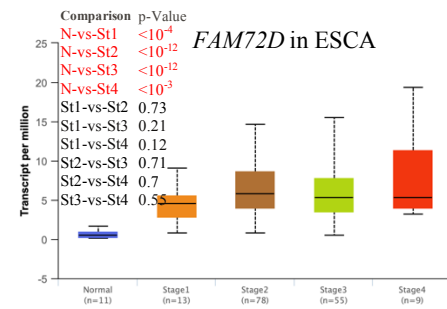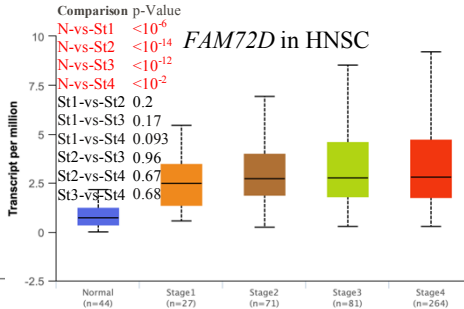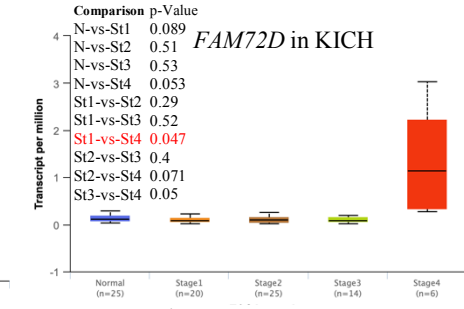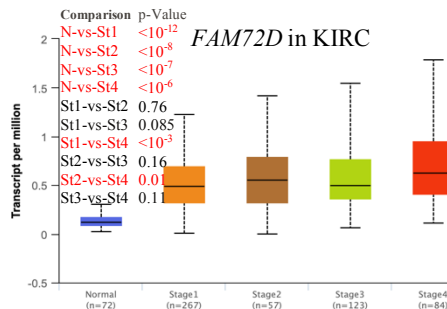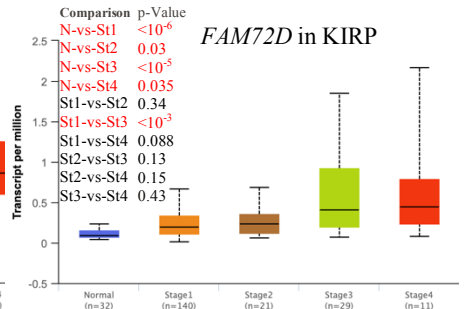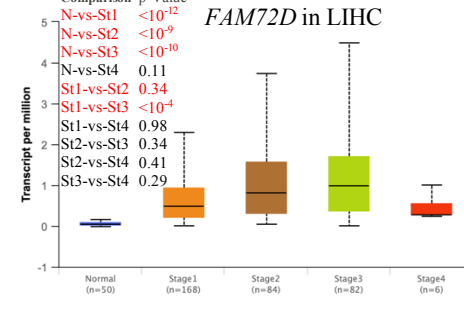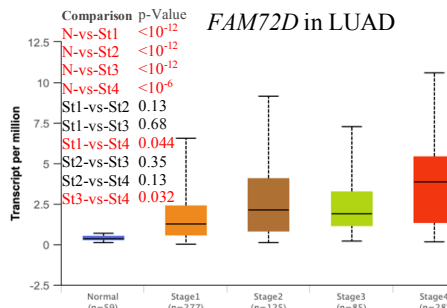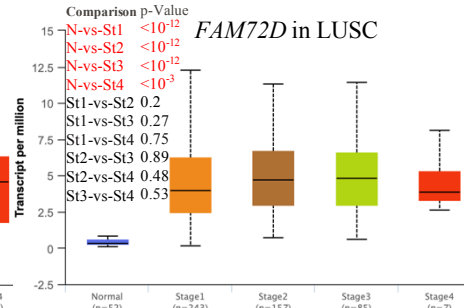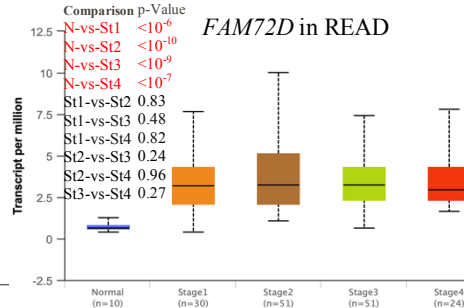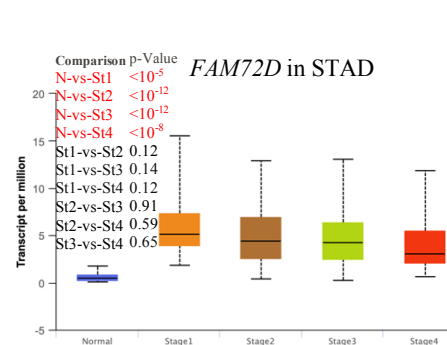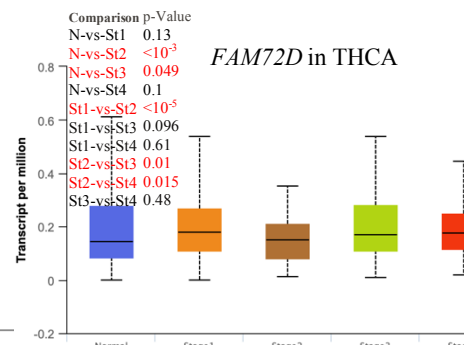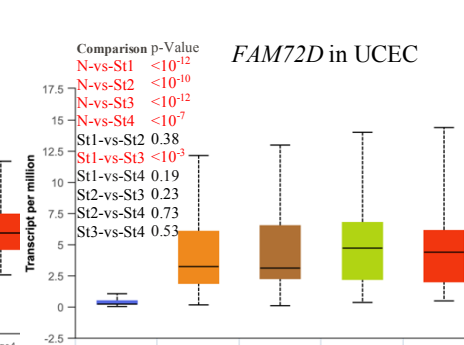

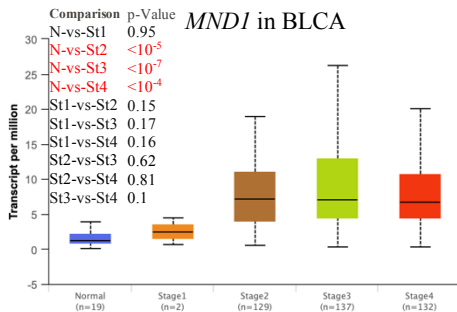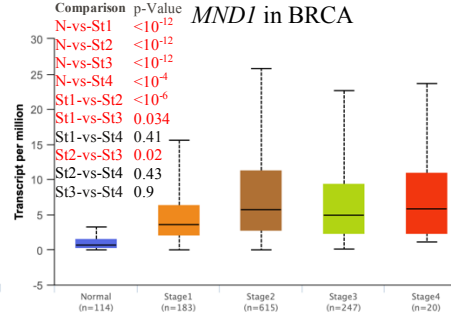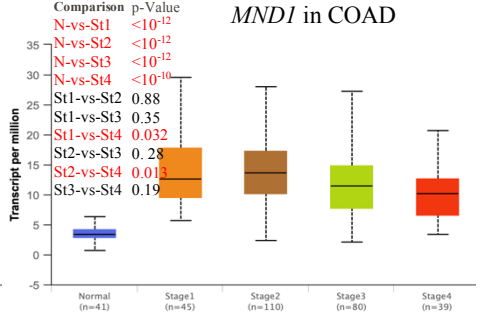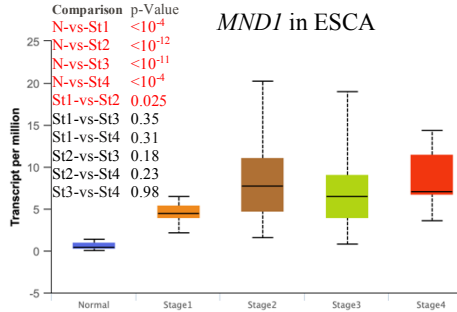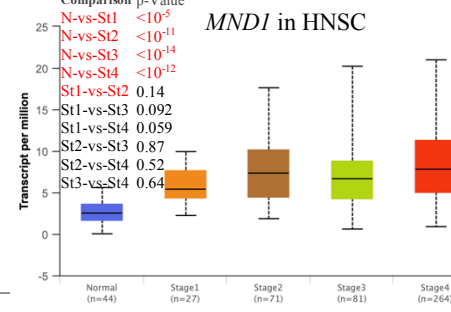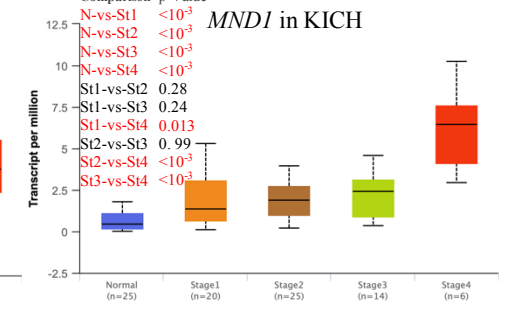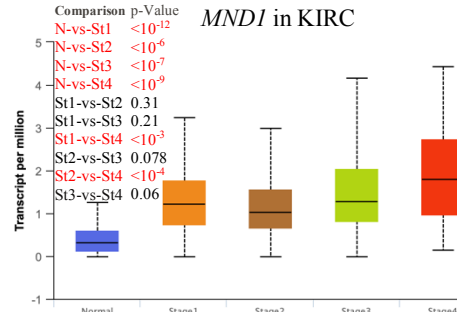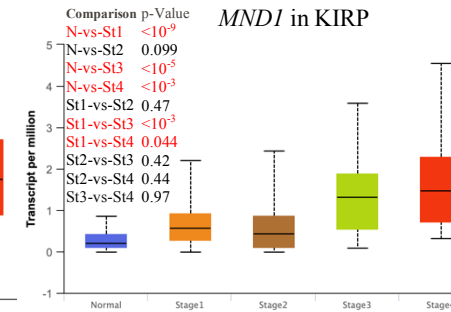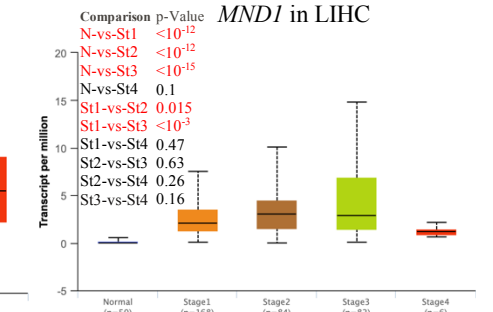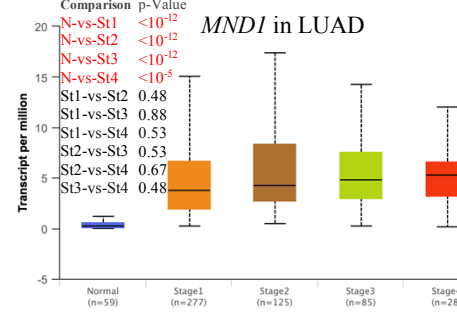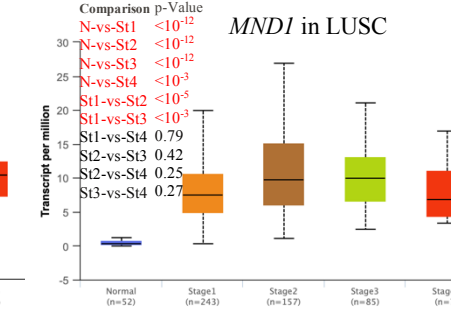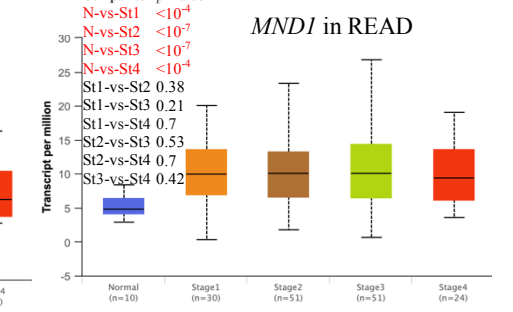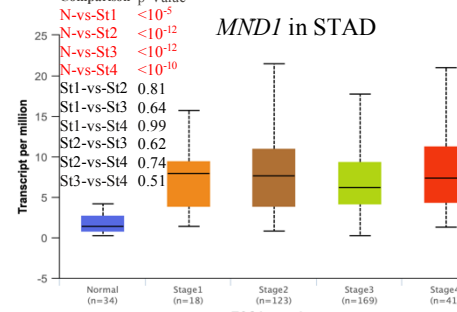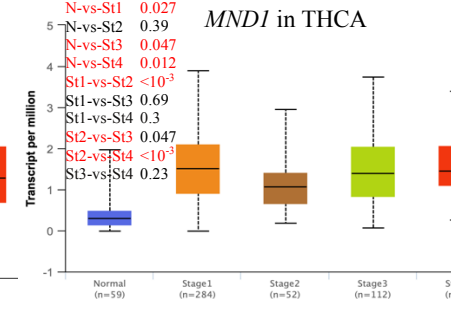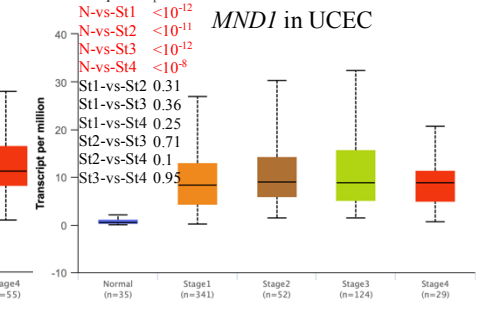

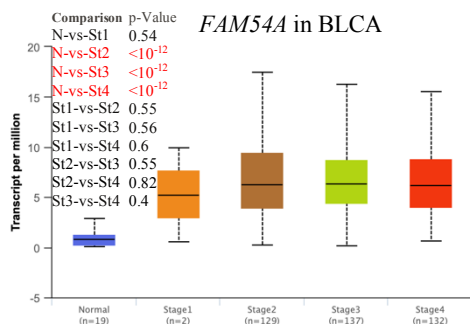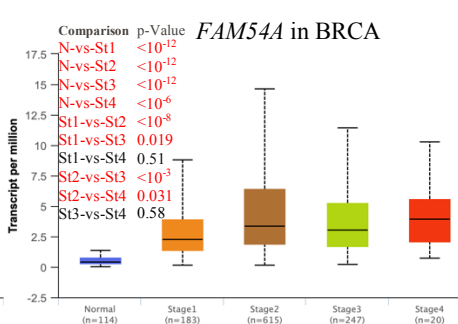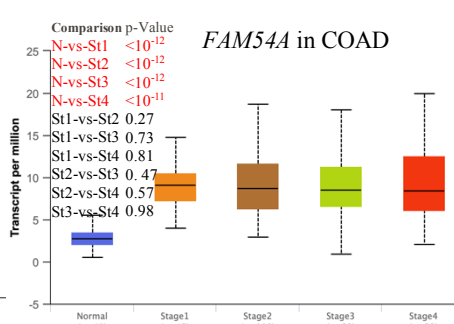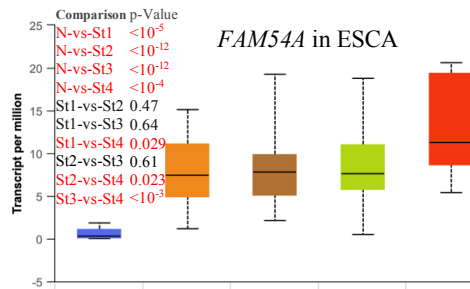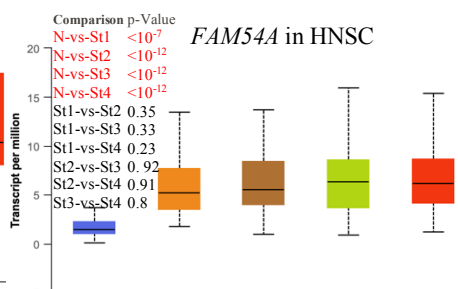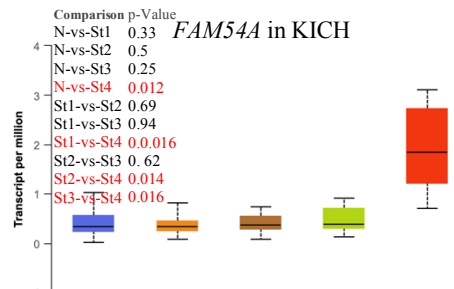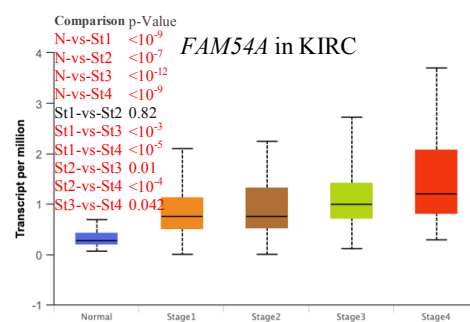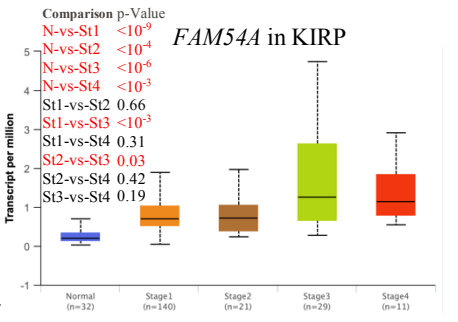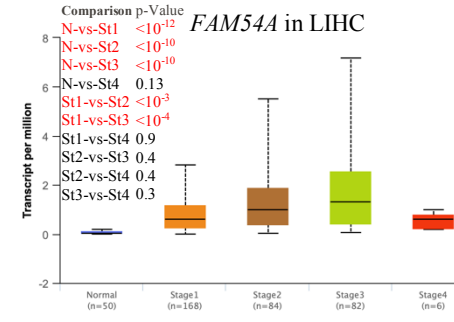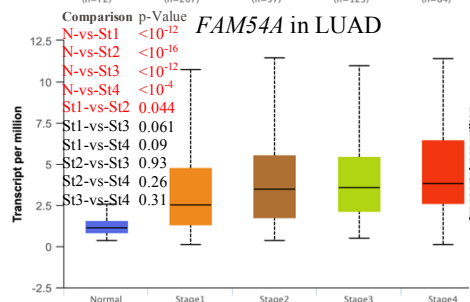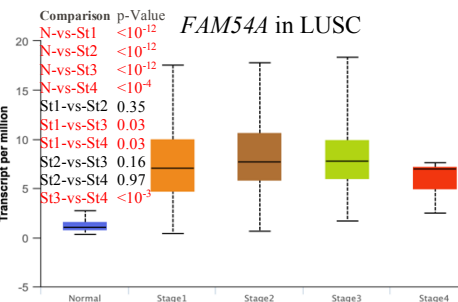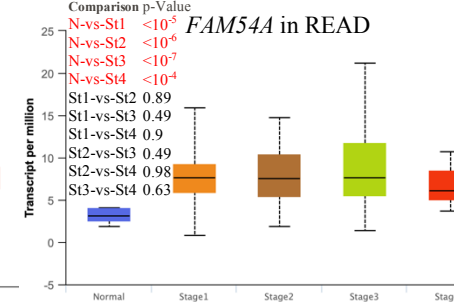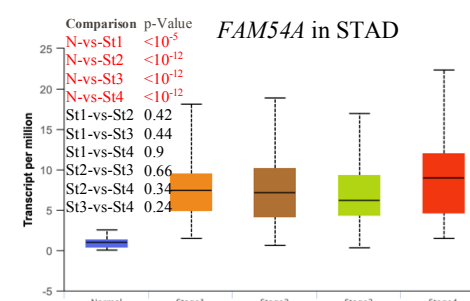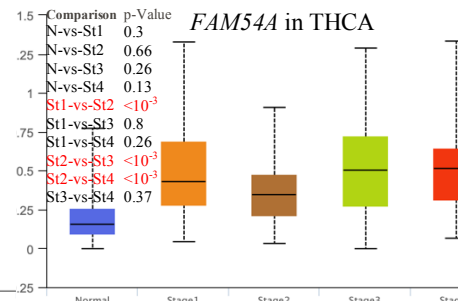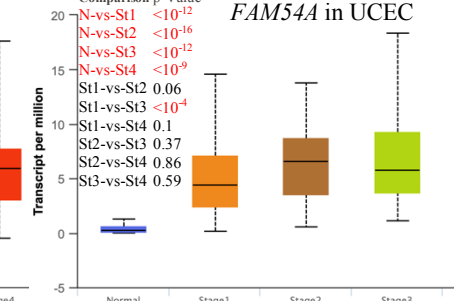

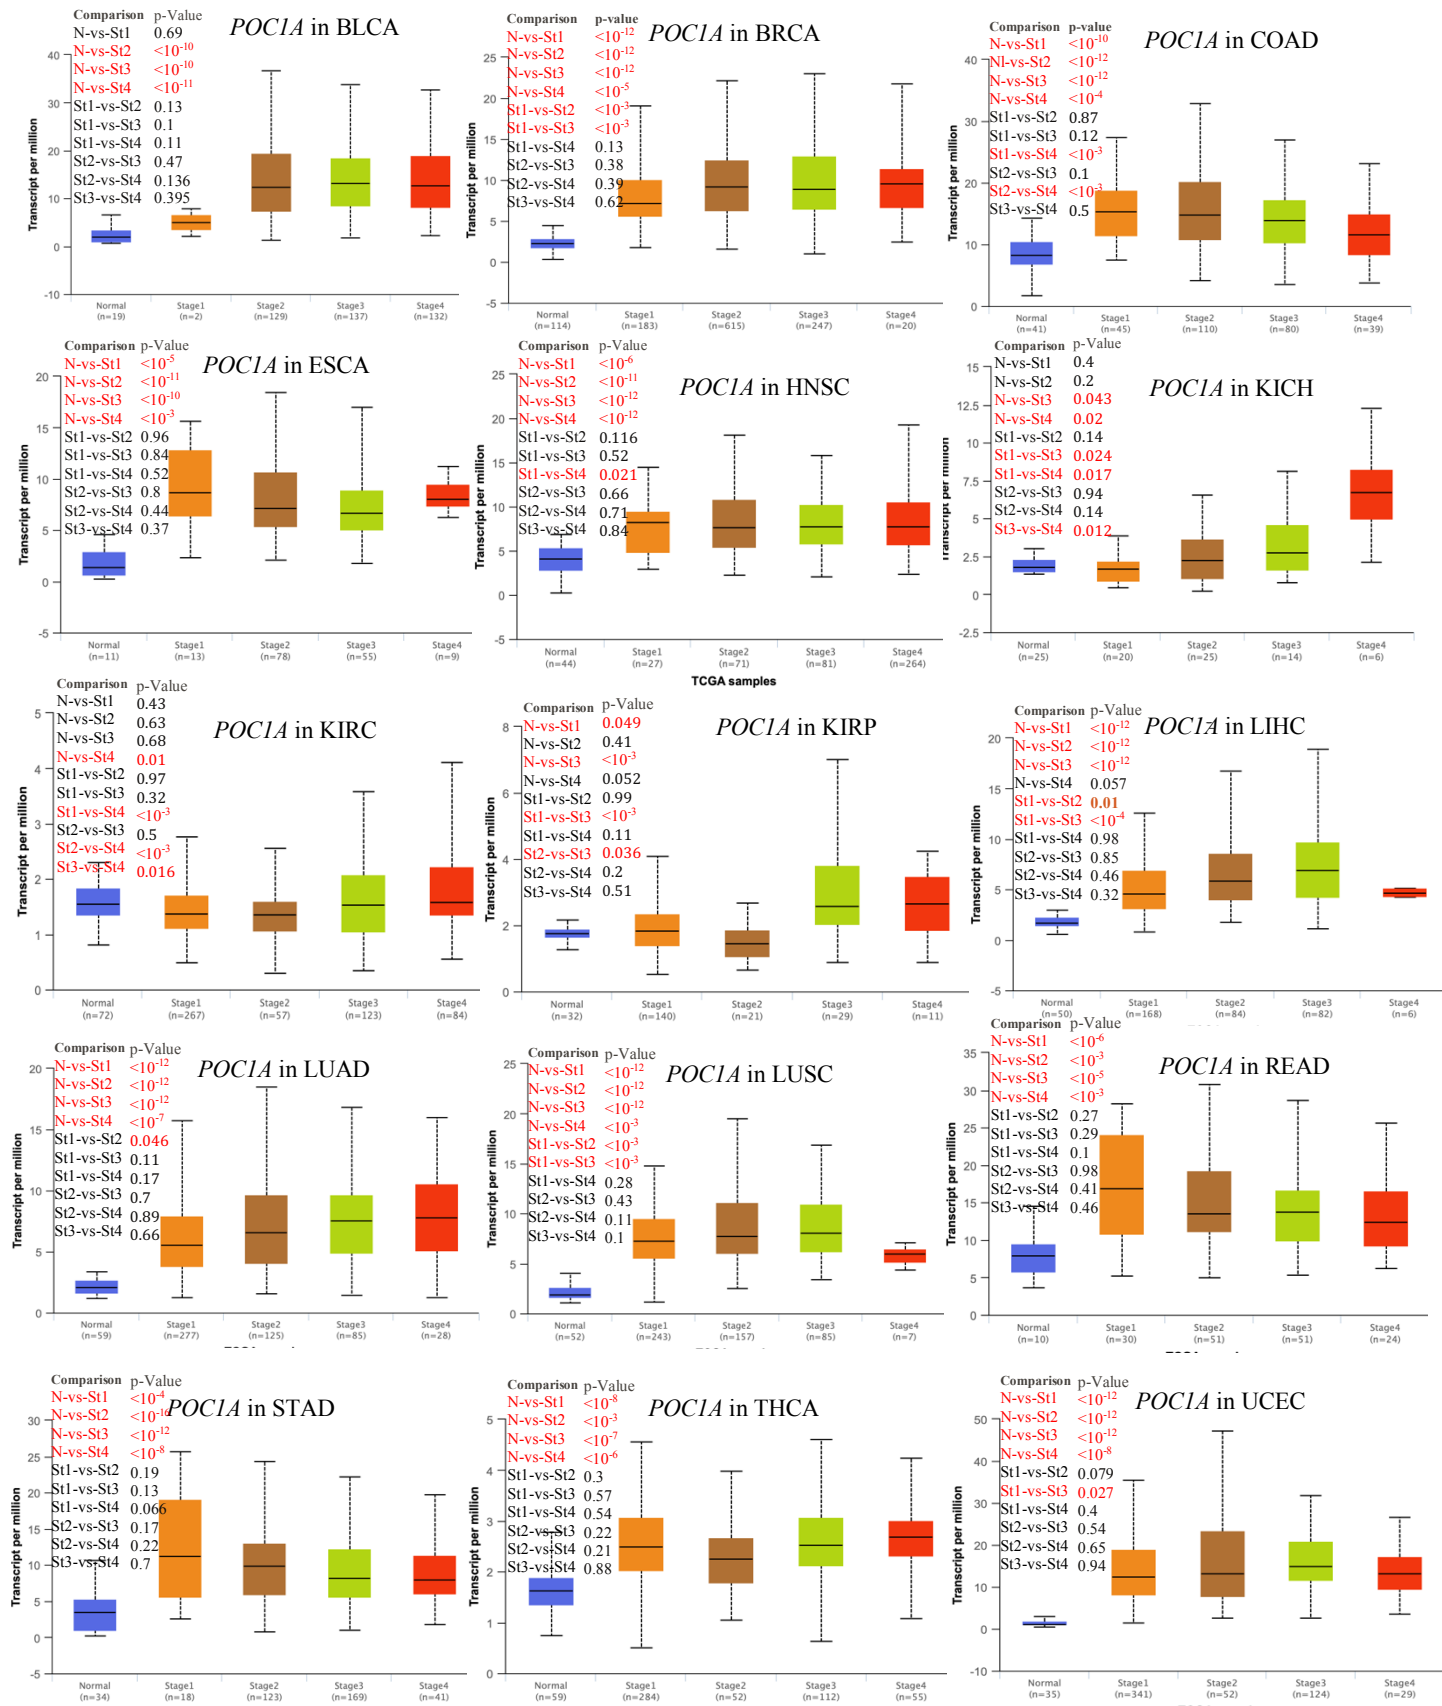

Supplement: s1 [file s1]
